# Supplementary material for: Nutritional profiling, fiber content and in vitro bioactivities of wheat-based biscuits formulated with novel ingredients
Source: Royal Society of Chemistry journal article supplement (doi:10.1039/d4fo00204k), 2024-01-01
Supplement: d4fo00204k1.pdf [file d4fo00204k1.pdf]

## Supplementary Tables

**Table 1S.** Recipes for the elaboration of wheat-based biscuits (control) with added ground chia seeds (GC) and defatted ground chia seeds (DGC) at 5, 10 and 15%; carob flour (CF) at 1, 5 and 10% and coconut sugar (CS) at 100%.

| Sample     | Wheat flour (g) | Chia seeds (g) | Carob flour (g) | White sugar (g) | Coconut sugar (g) | Distilled water (mL) | Sunflower oil (g) | NaHCO <sub>3</sub> (g) | NH <sub>4</sub> HCO <sub>3</sub> (g) | Salt (g) |
|------------|-----------------|----------------|-----------------|-----------------|-------------------|----------------------|-------------------|------------------------|--------------------------------------|----------|
| Control    | 130.0           | -              | -               | 35              | -                 | 30                   | 26                | 0.8                    | 0.4                                  | 1.0      |
| GC5        | 118.8           | 11.2           | -               | 35              | -                 | 30                   | 26                | 0.8                    | 0.4                                  | 1.0      |
| GC10       | 107.7           | 22.3           | -               | 35              | -                 | 30                   | 26                | 0.8                    | 0.4                                  | 1.0      |
| GC15       | 96.5            | 33.5           | -               | 35              | -                 | 30                   | 26                | 0.8                    | 0.4                                  | 1.0      |
| DGC5       | 118.8           | 11.2           | -               | 35              | -                 | 30                   | 26                | 0.8                    | 0.4                                  | 1.0      |
| DGC10      | 107.7           | 22.3           | -               | 35              | -                 | 30                   | 26                | 0.8                    | 0.4                                  | 1.0      |
| DGC15      | 96.5            | 33.5           | -               | 35              | -                 | 30                   | 26                | 0.8                    | 0.4                                  | 1.0      |
| CF1        | 127.8           | -              | 2.2             | 35              | -                 | 30                   | 26                | 0.8                    | 0.4                                  | 1.0      |
| CF5        | 118.8           | -              | 11.2            | 35              | -                 | 30                   | 26                | 0.8                    | 0.4                                  | 1.0      |
| CF10       | 107.7           | -              | 22.3            | 35              | -                 | 30                   | 26                | 0.8                    | 0.4                                  | 1.0      |
| CS100      | 130.0           | -              | -               | -               | 35                | 30                   | 26                | 0.8                    | 0.4                                  | 1.0      |
| CF1-CS100  | 127.8           | -              | 2.2             | -               | 35                | 30                   | 26                | 0.8                    | 0.4                                  | 1.0      |
| CF5-CS100  | 118.8           | -              | 11.2            | -               | 35                | 30                   | 26                | 0.8                    | 0.4                                  | 1.0      |
| CF10-CS100 | 107.7           | -              | 22.3            | -               | 35                | 30                   | 26                | 0.8                    | 0.4                                  | 1.0      |
